# Supplementary material for: CD169+ macrophages regulate PD-L1 expression via type I interferon and thereby prevent severe immunopathology after LCMV infection
Source: PubMed Central journal article supplement (PMC5260878; doi:10.1038/cddis.2016.350), 2016-11-03

# Supplementary Figure S2

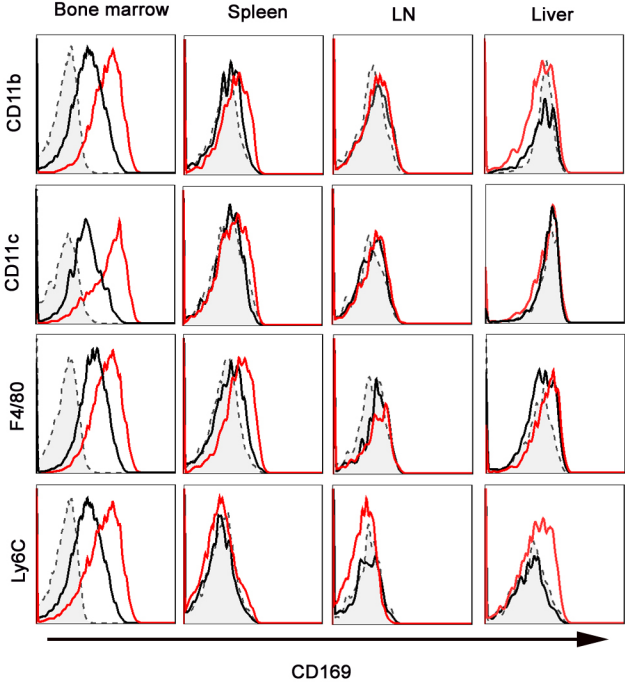

Supplement: cddis2016350x2.pdf [file cddis2016350x2.pdf]
